# Supplementary material for: KASL clinical practice guidelines for liver cirrhosis: Varices, hepatic encephalopathy, and related complications
Source: PubMed Central journal article supplement — Clin Mol Hepatol. 2020 Jan 10;26(2):83–127. doi: 10.3350/cmh.2019.0010n (PMC7160350; doi:10.3350/cmh.2019.0010n), 2020-01-10
Supplement: cmh-2019-0010n-suppl1.pdf [file cmh-2019-0010n-suppl1.pdf]

**Supplementary Table 1.** Generic questionnaire assessing health-related quality of life

| Questionnaire | Item                  | Structure                                                                                                                                                                                                                                                                                                 | Scoring system                                                                                 | Advantage                                                                                                                                                   | Disadvantage                                                                                       |
|---------------|-----------------------|-----------------------------------------------------------------------------------------------------------------------------------------------------------------------------------------------------------------------------------------------------------------------------------------------------------|------------------------------------------------------------------------------------------------|-------------------------------------------------------------------------------------------------------------------------------------------------------------|----------------------------------------------------------------------------------------------------|
| SF-36         | 36 Likert scale       | Two summary components: physical component summary+mental component summary<br>Eight domains: physical functioning, physical role, bodily pain, general health, vitality, social functioning, emotional role, mental health                                                                               | All domains and summary scores expressed as T-scores.<br>Higher scores mean better HRQoL.      | Easy to complete, higher sensitivity, most widely used questionnaire, multiple language versions, norm based scoring, shorter forms available (SF-8, SF-12) | License fee, need to use scoring algorithms, different normative data according to population      |
| SIP           | 136 dichotomous scale | Twelve domains in 3 dimensions:<br>1) Independent dimension: sleep & rest, eating, work, home management, recreation & pastimes. 2) Physical dimension: ambulation, mobility, body care, movement. 3) Psychosocial dimension: social interaction, alertness, behavior, emotional behavior, communication. | All domains and overall scores expressed as scales (0–100).<br>Higher scores mean worse HRQoL. | Widely used, comparable with other diseases                                                                                                                 | Burdensome to respond for severe patients, license fee to use, no validated foreign language forms |
| NHP           | 45 Likert scale       | Six domain scores: energy, pain, emotional reaction, sleep, social isolation, physical abilities.<br>Seven life areas affected: occupation, jobs in home, home life, social life, sex, hobbies, holidays,                                                                                                 | Domain scores expressed as scales (0–100).<br>Higher scores mean worse HRQoL.                  | No license fee, short time to complete, validated foreign language forms                                                                                    | Less used in liver disease patients                                                                |

SF-36, Medical Outcomes Study Short Form-36; HRQoL, health-related quality of life; SIP, Sickness Impact Profile; NHP, Nottingham health profile.
