# Supplementary material for: KASL clinical practice guidelines for liver cirrhosis: Varices, hepatic encephalopathy, and related complications
Source: PubMed Central journal article supplement — Clin Mol Hepatol. 2020 Jan 10;26(2):83–127. doi: 10.3350/cmh.2019.0010n (PMC7160350; doi:10.3350/cmh.2019.0010n), 2020-01-10
Supplement: cmh-2019-0010n-suppl2.pdf [file cmh-2019-0010n-suppl2.pdf]

**Supplementary Table 2.** Disease specific questionnaires for health-related quality of life in chronic liver disease patients

| Questionnaire | Item                   | Structure                                                                                                                                                                                                                                             | Scoring system                                                                                                                  | Advantage                          | Disadvantage                                                      |
|---------------|------------------------|-------------------------------------------------------------------------------------------------------------------------------------------------------------------------------------------------------------------------------------------------------|---------------------------------------------------------------------------------------------------------------------------------|------------------------------------|-------------------------------------------------------------------|
| CLDQ          | 29 Likert scales       | Six domain scores: abdominal symptoms, fatigue, systemic symptoms, activity, emotional function, worry                                                                                                                                                | All domains and overall scores expressed as scales (1–7).<br>Higher scores mean better HRQoL.                                   | Simple scoring system              | Sometimes hard to recognize the small change in HRQoL             |
| LDQOL         | 75 Likert scales+SF-36 | Twelve liver specific domains: symptoms, effect on daily living, concentration, memory, sexual function, sexual problems, sleep, loneliness, hopelessness, quality of social interaction, health distress and self-perceived stigma of liver disease. | All domains expressed as scales (0–100).<br>Higher scores mean better HRQoL.                                                    | Sometimes more sensitive than CLDQ | Limitation of published data                                      |
| SF-LDQOL      | 36 Likert scales+SF-36 | Nine domains: symptoms, effects of liver disease, memory/concentration, sleep, hopeless, distress, loneliness, stigma of liver disease/sexual problems.                                                                                               | All domains expressed as scales (0–100).<br>Higher scores mean better HRQoL.                                                    | Sometimes more sensitive than CLDQ | Limitation of published data                                      |
| LDSI          | 18 Likert scales       | Nine symptom severity scales: itch, joint pain, abdominal pain, daytime sleepiness, worry about family situation, decreased appetite, depression, fear of complications, jaundice, nine symptom hindrance scales.                                     | Symptom severity expressed as scales (1–5).<br>Symptom hindrance expressed as scales (0–10).<br>Higher scores mean worse HRQoL. |                                    | Limitation of published data<br>Only validated in the Netherlands |

CLDQ, chronic liver disease questionnaire; HRQoL, health-related quality of life; LDQOL, liver disease quality of life; SF-36, Medical Outcomes Study Short Form-36; SF-LDQOL, short form liver disease quality of life; LDSI, liver disease symptom index.
